# Supplementary material for: On the Scavenging Ability of Scutellarein against the OOH Radical in Water and Lipid-like Environments: A Theoretical Study
Source: MDPI journal article supplement (doi:10.3390/antiox11020224), 2022-01-25
Supplement: s1 [file s1]

## On the scavenging ability of scutellarein against the OOH radical in water and lipid-like environments. A quantum chemical and kinetic investigation

Maciej Spiegel<sup>1,2</sup>, Tiziana Marino<sup>2</sup>, Mario Prejanò<sup>2</sup> and Nino Russo<sup>2</sup>

<sup>1</sup> Department of Pharmacognosy and Herbal Medicines, Wrocław Medical University, Borowska 211A, 50-556 Wrocław, Poland

<sup>2</sup> Dipartimento di Chimica e Tecnologie Chimiche, Università della Calabria, I-87136 Rende (CS), Italy

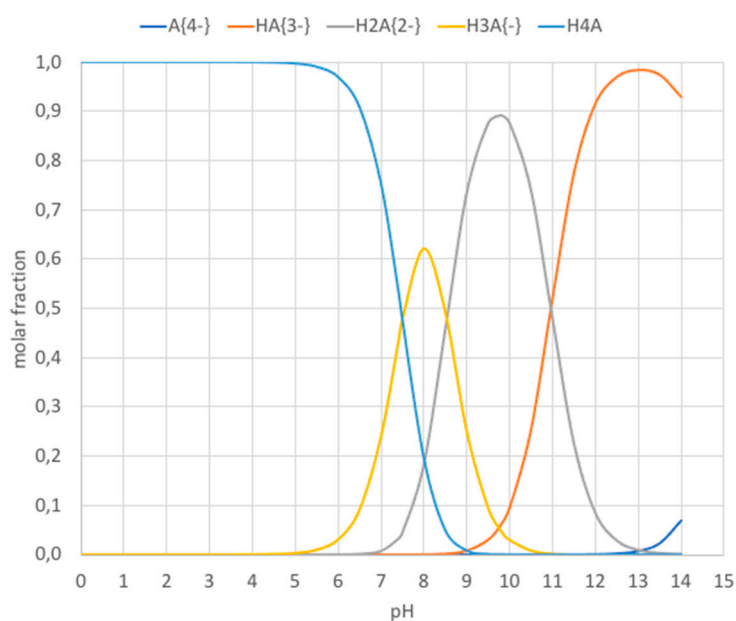

Figure S1. Distribution diagram of scutellarein as a function of pH.
